# Supplementary material
Source: PubMed Central journal article supplement (PMC8760095)
Supplement: mmc1.pdf [file mmc1.pdf]

## Annex I: Questionnaires to Measure COVID-19 Related Knowledge Sharing Practice (KSP) and Associated Factors

| Please write your appropriate answer for the given questions in the space provided.     |                                                                                               |                                                                                                                                                |                |                    |              |        |
|-----------------------------------------------------------------------------------------|-----------------------------------------------------------------------------------------------|------------------------------------------------------------------------------------------------------------------------------------------------|----------------|--------------------|--------------|--------|
| Part 1: Socio-demographic factors                                                       |                                                                                               |                                                                                                                                                |                |                    |              |        |
| 1                                                                                       | Age in years                                                                                  | _____                                                                                                                                          |                |                    |              |        |
| 2                                                                                       | Sex                                                                                           | 1. Male    2. Female                                                                                                                           |                |                    |              |        |
| 3                                                                                       | Educational status                                                                            | 1. Diploma    2. BSc degree    3. Master and above                                                                                             |                |                    |              |        |
| 4                                                                                       | Marital status                                                                                | 1. 1. Married    2. Single    3. Divorced    4. Separated    5. Widowed                                                                        |                |                    |              |        |
| 5                                                                                       | Religion                                                                                      | 1. 1. Orthodox Christian    2. Muslim    3. Protestant    4. Others specify.....                                                               |                |                    |              |        |
| 6                                                                                       | Professions                                                                                   | 1. 1. Medical Doctor    2. Nursing    3. Laboratory    4. Midwifery    5. Anesthesia<br>6. Pharmacy    7. Radiology    8. Others, specify----- |                |                    |              |        |
| 7                                                                                       | Experience at COVID-19 treatment center                                                       | 1. 1. <=1 month    2. Two month    3. >=3 month                                                                                                |                |                    |              |        |
| 8                                                                                       | Salary                                                                                        | _____ (ETB)                                                                                                                                    |                |                    |              |        |
| 9                                                                                       | Work place                                                                                    | 1. 1. Gondar university hospital    2. Bahirdar Tibebejion hospital                                                                            |                |                    |              |        |
| S.no                                                                                    | History of COVID-19 infection                                                                 |                                                                                                                                                |                |                    |              |        |
| 1                                                                                       | Have you ever been infected with COVID-19?                                                    | Yes                                                                                                                                            | No             |                    |              |        |
| 2                                                                                       | If the answer is yes how many times affected with COVID-19?                                   | 1. One                                                                                                                                         | 2. Twice       | 3. More than twice |              |        |
| 3                                                                                       | Have one or more members of your family been infected with COVID-19?                          | Yes                                                                                                                                            | No             |                    |              |        |
| 4                                                                                       | If the answer is yes how many family members were affected with covid-19?                     | 1.one                                                                                                                                          | 2. two         | 3. more than two   |              |        |
| S.no                                                                                    | Mobile phone access and usage                                                                 |                                                                                                                                                |                |                    |              |        |
| 1                                                                                       | Do you have a mobile phone?                                                                   | 1.yes                                                                                                                                          | 2. no          |                    |              |        |
| 2                                                                                       | If the answer is yes what types of mobile phones do you have?                                 | 1.smart phone                                                                                                                                  | 2. basic phone |                    |              |        |
| 3                                                                                       | Do you have social media account?                                                             | 1.yes                                                                                                                                          | 2. no          |                    |              |        |
| Please circle your appropriate answer for the given questions in the given alternative. |                                                                                               |                                                                                                                                                |                |                    |              |        |
| S. no                                                                                   | COVID-19 related Knowledge sharing practice                                                   | Never                                                                                                                                          | Rarely         | Sometime           | Most of time | Always |
| KSP1                                                                                    | I share knowledge regarding COVID-19 from work experiences with the hospital's staff          | 1                                                                                                                                              | 2              | 3                  | 4            | 5      |
| KSP2                                                                                    | I share knowledge regarding COVID-19 from news, magazines, and journals to the hospital staff | 1                                                                                                                                              | 2              | 3                  | 4            | 5      |

|              |                                                                                                                          |                          |                 |                |              |                       |
|--------------|--------------------------------------------------------------------------------------------------------------------------|--------------------------|-----------------|----------------|--------------|-----------------------|
| KSP3         | I share knowledge regarding COVID-19 from communication (face to face, e-mail) with colleagues                           | 1                        | 2               | 3              | 4            | 5                     |
| KSP4         | I share knowledge regarding COVID-19 from training and seminars about coronavirus disease with my staffs                 | 1                        | 2               | 3              | 4            | 5                     |
| KSP5         | I share the knowledge I was hearing and seeing any information regarding COVID-19 from the COVID-19 treatment center     | 1                        | 2               | 3              | 4            | 5                     |
| KSP6         | I share knowledge regarding COVID-19 from COVID-19 patients with new sign and symptoms                                   | 1                        | 2               | 3              | 4            | 5                     |
| KSP7         | I share knowledge regarding COVID-19 from social media (Facebook, Twitter, blog ...)                                     | 1                        | 2               | 3              | 4            | 5                     |
| KSP8         | I share knowledge regarding COVID-19 from observations of COVID-19 patients                                              | 1                        | 2               | 3              | 4            | 5                     |
| KSP9         | I share knowledge regarding COVID-19 from the internet (Google, Google scholars, pub med, websites of the organizations) | 1                        | 2               | 3              | 4            | 5                     |
| KSP10        | I share knowledge regarding COVID-19 from phone conversation                                                             | 1                        | 2               | 3              | 4            | 5                     |
| KSP11        | I share knowledge regarding COVID-19 from COVID-19 patient documented file (manual and electronic form)                  | 1                        | 2               | 3              | 4            | 5                     |
| KSP12        | I share knowledge regarding COVID-19 from the WHO coronavirus report                                                     | 1                        | 2               | 3              | 4            | 5                     |
| <b>S. no</b> | <b>Awareness about COVID-19 knowledge sharing</b>                                                                        | <b>Strongly disagree</b> | <b>Disagree</b> | <b>Neutral</b> | <b>Agree</b> | <b>Strongly Agree</b> |
| A1           | I have awareness about the importance of COVID-19 related knowledge sharing in daily work.                               | 1                        | 2               | 3              | 4            | 5                     |
| A2           | Knowledge sharing helps to gain new ideas, skills, or techniques about coronavirus disease.                              | 1                        | 2               | 3              | 4            | 5                     |
| A3           | COVID-19 related knowledge sharing helps to reduce the same mistake we have made before.                                 | 1                        | 2               | 3              | 4            | 5                     |
| A4           | Knowledge sharing helps to learn faster about the COVID-19 pandemic.                                                     | 1                        | 2               | 3              | 4            | 5                     |
| <b>S.no</b>  | <b>Job satisfaction in the time of treating COVID-19 patients</b>                                                        |                          |                 |                |              |                       |
| Js1          | I am satisfied with the reward and recognition mechanism when I have been helped, COVID-19 patients                      | 1                        | 2               | 3              | 4            | 5                     |
| Js2          | I am satisfied with the attractive salary for my job that I was worked in COVID-19 treatment center                      | 1                        | 2               | 3              | 4            | 5                     |
| Js3          | I am satisfied with treated COVID -19 patients                                                                           | 1                        | 2               | 3              | 4            | 5                     |
| Js4          | I am satisfied with the work that I have cured COVID-19 patients                                                         | 1                        | 2               | 3              | 4            | 5                     |
| Js5          | I am satisfied with all the equipment's, supplies, and resources to give treatment to COVID-19 patients                  | 1                        | 2               | 3              | 4            | 5                     |

|             |                                                                                                                                                   |              |   |            |   |        |
|-------------|---------------------------------------------------------------------------------------------------------------------------------------------------|--------------|---|------------|---|--------|
| <b>S.no</b> | <b>Intrinsic motivation</b>                                                                                                                       |              |   |            |   |        |
| IM1         | I enjoy helping my colleagues by sharing my knowledge regarding COVID-19                                                                          | 1            | 2 | 3          | 4 | 5      |
| IM2         | I believe that my experience can improve work efficiency and increase productivity by sharing knowledge regarding COVID-19.                       | 1            | 2 | 3          | 4 | 5      |
| <b>S.no</b> | <b>Willingness to share knowledge regarding COVID-19</b>                                                                                          |              |   |            |   |        |
| W1          | I am willing to share knowledge and experience regarding COVID-19 with colleagues.                                                                | 1            | 2 | 3          | 4 | 5      |
| W2          | I am willing to share knowledge from training and workshop about coronavirus disease with colleagues.                                             | 1            | 2 | 3          | 4 | 5      |
| W3          | I am willing to share COVID-19 related knowledge from the government official website with colleagues.                                            | 1            | 2 | 3          | 4 | 5      |
| <b>S.no</b> | <b>Extrinsic motivation</b>                                                                                                                       |              |   |            |   |        |
| Em1         | Incentive and reward (promotion, bonus) for the individual who shares their knowledge regarding COVID-19                                          | 1            | 2 | 3          | 4 | 5      |
| Em2         | Acknowledgment and recognition for individuals who are committed to sharing their knowledge regarding COVID-19                                    | 1            | 2 | 3          | 4 | 5      |
| <b>S.no</b> | <b>Supportive leadership regarding COVID-19</b>                                                                                                   |              |   |            |   |        |
| SL1         | Managers of the organization encourage knowledge-sharing practices regarding COVID-19 with colleagues.                                            | 1            | 2 | 3          | 4 | 5      |
| SL2         | Managers of the organization encourage new ideas for new opportunities and focusing on learning from failure treating coronavirus patients.       | 1            | 2 | 3          | 4 | 5      |
| SL3         | Managers of the organization advise team members to make a decision and solve the problem regarding COVID-19 to share their knowledge with staff. | 1            | 2 | 3          | 4 | 5      |
| <b>S.no</b> | <b>Teamwork regarding to COVID-19</b>                                                                                                             |              |   |            |   |        |
| Tw1         | I cooperate with my colleague rather than competing with them to share knowledge regarding COVID-19                                               | 1            | 2 | 3          | 4 | 5      |
| Tw2         | Most of the staff work cooperatively to share knowledge regarding COVID-19                                                                        | 1            | 2 | 3          | 4 | 5      |
| Tw3         | Organizations encourage team-work to sharing knowledge related COVID-19                                                                           | 1            | 2 | 3          | 4 | 5      |
| <b>S.no</b> | <b>Training, Internet and computer access</b>                                                                                                     |              |   |            |   |        |
| TIC1        | Do you have any kind of computer training?                                                                                                        | Yes          |   | No         |   |        |
| TIC2        | If yes for the above question where do you get it?                                                                                                | At workplace |   | At private |   | Others |
| TIC3        | Do you have the access/ the opportunity/ to use a computer?                                                                                       | Yes          |   | No         |   |        |
| TIC4        | If yes for the above question where do you get it?                                                                                                | At workplace |   | At home    |   | Others |
| TIC5        | Do you have the access/ the opportunity/ to use the internet?                                                                                     | Yes          |   | No         |   |        |

|             |                                                                                                   |              |         |        |
|-------------|---------------------------------------------------------------------------------------------------|--------------|---------|--------|
| TIC6        | If yes for the above question where do you get it?                                                | At workplace | At home | Others |
| <b>S.no</b> | <b>Source for COVID-19 knowledge sharing</b>                                                      |              |         |        |
| SC1         | Are articles and documentations a source for knowledge sharing regarding COVID-19?                | Yes          | No      |        |
| SC2         | Are social media the source for knowledge sharing regarding COVID-19?                             | Yes          | No      |        |
| SC3         | Are government official websites as a source for knowledge sharing regarding COVID-19             | Yes          | No      |        |
| SC4         | Are COVID-19 reports the source for knowledge-sharing practice about coronavirus disease?         | Yes          | No      |        |
| <b>S.no</b> | <b>Information technology to share COVID-19 knowledge</b>                                         |              |         |        |
| T1          | Have you ever store your data/file on a computer or smartphone?                                   | Yes          | No      |        |
| T2          | Have you ever delete any unwanted files onto the computer?                                        | Yes          | No      |        |
| T3          | Have you ever save any download files onto the computer or smartphone?                            | Yes          | No      |        |
| T4          | Have you ever download and install the software onto the computer or smartphone?                  | Yes          | No      |        |
| T5          | Have you ever create and change passwords on the computer?                                        | Yes          | No      |        |
| <b>S.no</b> | <b>Communication channels regarding COVID-19 knowledge</b>                                        |              |         |        |
| Cc1         | Mobile phone (conversion, SMS) communication is channels for knowledge sharing regarding COVID-19 | Yes          | No      |        |
| Cc2         | communication through internet access is a channels for knowledge sharing regarding COVID-19      | Yes          | No      |        |
| Cc3         | Communication through email is a channel for knowledge sharing regarding COVID-19.                | Yes          | No      |        |
| Cc4         | Communication through social media is a channel for knowledge sharing regarding COVID-19.         | Yes          | No      |        |
